# Supplementary material
Source: PubMed Central journal article supplement (PMC1895391)
Supplement: blood_2005-08-3518_3.pdf [file blood_2005-08-3518_3.pdf]

|                      | Age (yr) | Week 1            | n  | Week4             | n  |
|----------------------|----------|-------------------|----|-------------------|----|
|                      |          | Median (min, max) |    | Median (min, max) |    |
| V1 (mL/kg)           | All      | 53 (35-76)        | 14 | 54 (35-74)        | 11 |
|                      | 2-9      | 54 (43-76)        | 7  | 62 (54-74)        | 4  |
|                      | 10-18    | 52 (35-73)        | 7  | 49 (35-62)        | 7  |
| Exit Half-time* (hr) | All      | 49 (16-83)        | 14 | 83 (25-193)       | 11 |
|                      | 2-9      | 45 (31-55)        | 7  | 100 (83-193)      | 4  |
|                      | 10-18    | 57 (16-83)        | 7  | 57 (25-97)        | 7  |

\*Age x week interaction significant in two-way analysis of variance,  $p < 0.015$
